# Supplementary material for: The Effect of Combined Drought and Temperature Stress on the Physiological Status of Calcareous Grassland Species as Potential Candidates for Urban Green Infrastructure
Source: MDPI journal article supplement (doi:10.3390/plants12102003), 2023-05-16
Supplement: s1 [file s1]

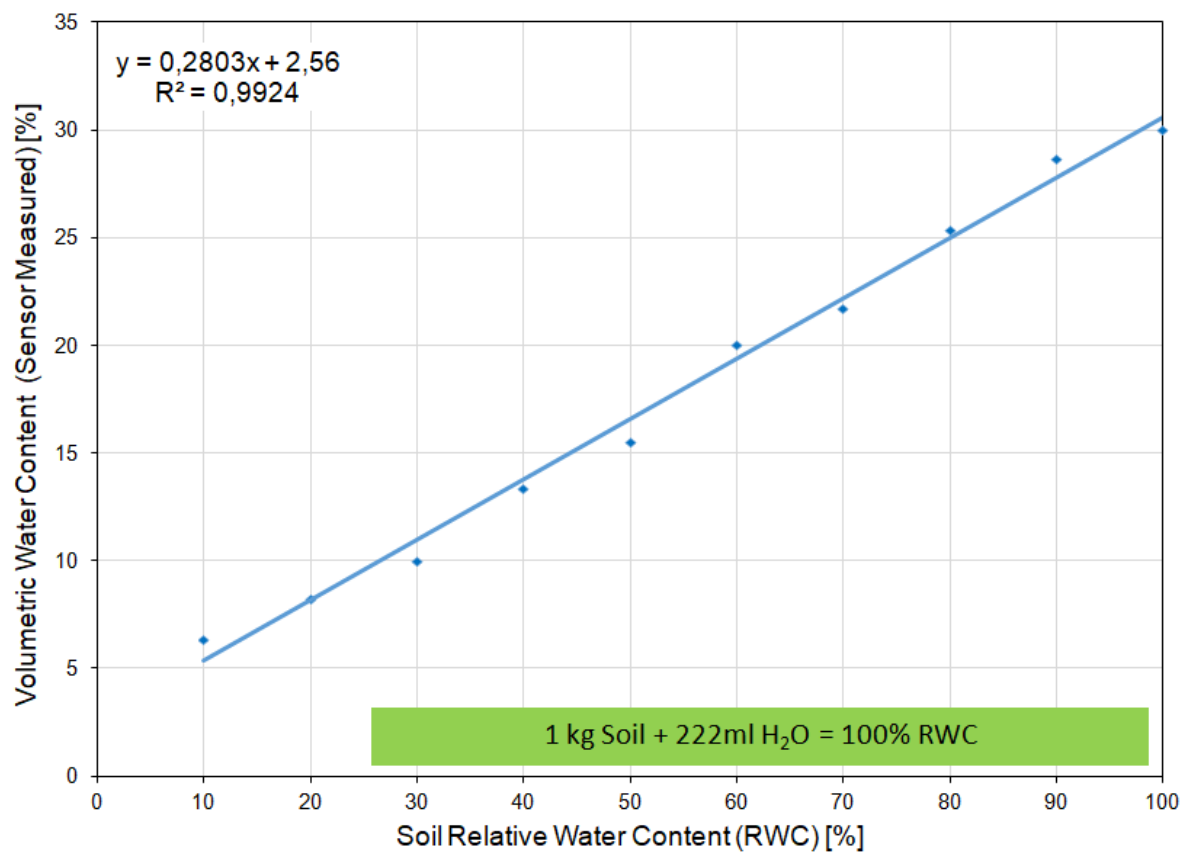

**Figure S1.** Irrigation curve based on sensor measurements between full water capacity and full dry soil. The full water capacity was determined empirically and corresponds to 222 ml H<sub>2</sub>O for 1 kg soil. Based on the sensor readings, the pots were supplied with missing % of RWC in the corresponding treatments.
